# Supplementary material for: Estrogen-dependent expression and function of secretogranin 2a in female-specific peptidergic neurons
Source: PubMed Central journal article supplement — PNAS Nexus. 2023 Nov 29;2(12):pgad413. doi: 10.1093/pnasnexus/pgad413 (PMC10726998; doi:10.1093/pnasnexus/pgad413), 2023-11-29
Supplement: pgad413_supplementary_data.pdf [file pgad413_supplementary_data.pdf]

**Supplementary Information for**

**Estrogen-dependent expression and function of secretogranin 2a in female-specific peptidergic neurons**

Thomas Fleming, Masaya Tachizawa, Yuji Nishiike, Ai Koiwa, Yuki Homan, and Kataaki Okubo\*

\*Corresponding author: Kataaki Okubo; Email: a-okubo@g.ecc.u-tokyo.ac.jp

**This PDF file includes:**

Table S1 to S3

Figure S1 to S8

**Table S1. Abbreviations of brain nuclei.**

| abbreviation | full name                                                     | location              |
|--------------|---------------------------------------------------------------|-----------------------|
| Ci           | interpeduncular corpus                                        | brain stem            |
| CP           | central posterior nucleus                                     | thalamus              |
| DI           | lateral nucleus of the dorsal telencephalic area              | dorsal telencephalon  |
| DP           | dorsal posterior nucleus                                      | thalamus              |
| DT           | dorsal tegmental nucleus                                      | midbrain tegmentum    |
| Hd           | dorsal habenula                                               | habenula              |
| IR           | inferior rectus of the oculomotor nerve nucleus               | midbrain tegmentum    |
| is           | isthmus nucleus                                               | brain stem            |
| MR           | medial rectus of the oculomotor nerve nucleus                 | midbrain tegmentum    |
| NAT          | anterior tuberal nucleus                                      | hypothalamus          |
| NPPv         | posterior periventricular nucleus                             | hypothalamus          |
| NPT          | posterior tuberal nucleus                                     | hypothalamus          |
| NRL          | lateral recess nucleus                                        | hypothalamus          |
| NRP          | posterior recess nucleus                                      | hypothalamus          |
| NVm          | trigeminal motor nucleus                                      | brain stem            |
| NVT          | ventral tuberal nucleus                                       | hypothalamus          |
| Pbl          | basal lateral preoptic nucleus                                | preoptic area         |
| PMg          | gigantocellular portion of the magnocellular preoptic nucleus | preoptic area         |
| PMm          | magnocellular portion of the magnocellular preoptic nucleus   | preoptic area         |
| PMp          | parvocellular portion of the magnocellular preoptic nucleus   | preoptic area         |
| PPa          | anterior parvocellular preoptic nucleus                       | preoptic area         |
| PPp          | posterior parvocellular preoptic nucleus                      | preoptic area         |
| ra           | raphe nucleus                                                 | brain stem            |
| TL           | lateral tuberal nucleus                                       | hypothalamus          |
| TN           | terminal nerve ganglion                                       | ventral telencephalon |
| VL           | ventrolateral nucleus                                         | thalamus              |
| VI           | lateral nucleus of the ventral telencephalic area             | ventral telencephalon |
| VM           | ventromedial nucleus                                          | thalamus              |
| Vp           | posterior nucleus of the ventral telencephalic area           | ventral telencephalon |
| Vs           | supracommissural nucleus of the ventral telencephalic area    | ventral telencephalon |
| Vv           | ventral nucleus of the ventral telencephalic area             | ventral telencephalon |

**Table S2. Species names and GenBank accession numbers of the protein sequences used in this study.**

| protein           | species                                      | accession number |
|-------------------|----------------------------------------------|------------------|
| SCG2              | human ( <i>Homo sapiens</i> )                | NP_003460        |
| SCG2              | bovine ( <i>Bos taurus</i> )                 | NP_776601        |
| SCG2              | mouse ( <i>Mus musculus</i> )                | NP_033155        |
| SCG2              | rat ( <i>Rattus norvegicus</i> )             | NP_073160        |
| Scg2 (predicted)  | chicken ( <i>Gallus gallus</i> )             | XP_040535213     |
| Scg2              | <i>Xenopus</i> ( <i>Xenopus tropicalis</i> ) | NP_001072311     |
| Scg2a (predicted) | tilapia ( <i>Oreochromis aureus</i> )        | XP_039478438     |
| Scg2a (predicted) | zebrafish ( <i>Danio rerio</i> )             | XP_009290228     |
| Scg2a (predicted) | cavefish ( <i>Astyanax mexicanus</i> )       | XP_007237528     |
| Scg2b (predicted) | tilapia ( <i>Oreochromis aureus</i> )        | XP_031611738     |
| Scg2b             | zebrafish ( <i>Danio rerio</i> )             | NP_001071216     |
| Scg2b (predicted) | cavefish ( <i>Astyanax mexicanus</i> )       | XP_022534954     |
| CHGA              | human ( <i>Homo sapiens</i> )                | NP_001266        |
| CHGB              | human ( <i>Homo sapiens</i> )                | NP_001810        |

**Table S3. Primers and probes used in this study.**

|        | target       | direction | purpose               | sequence (5' to 3')                |
|--------|--------------|-----------|-----------------------|------------------------------------|
| primer | <i>scg2a</i> | forward   | real-time PCR         | CGCGCCAAATAATTACGAAAG              |
| primer | <i>scg2a</i> | reverse   | real-time PCR         | CAGCAGAAGCGAACACAAGAAG             |
| primer | <i>actb</i>  | forward   | real-time PCR         | CCCCACCCAAAGTTTAG                  |
| primer | <i>actb</i>  | reverse   | real-time PCR         | CAACGATGGAGGGAAAGACA               |
| primer | <i>eef1a</i> | forward   | real-time PCR         | AGAAGGAAGCCGCTGAGATG               |
| primer | <i>eef1a</i> | reverse   | real-time PCR         | AGAGCGATGTCGATGGTGATAC             |
| primer | <i>scg2a</i> | forward   | genotyping (gDNA PCR) | AAGACAGGATAAGAGTGAAGAGCT           |
| primer | <i>scg2a</i> | reverse   | genotyping (gDNA PCR) | CAGCATCATCTGCATTATTAGACC           |
| primer | <i>scg2a</i> | forward   | genotyping (CS)       | AGAGACCAGGAACAAACAGAGG             |
| primer | <i>scg2a</i> | forward   | genotyping (HRM)      | GAGGAAGGTGAGGATGACAGGG             |
| primer | <i>scg2a</i> | reverse   | genotyping (HRM)      | TCCAGCTCGTCAAACACAGACT             |
| probe  | <i>scg2a</i> | forward   | genotyping (HRM)      | CGCACCAAAGAAAACGTGGAGGAG<br>AAGTAC |
| primer | <i>esr1</i>  | forward   | genotyping (gDNA PCR) | TCCGGTGGAAAACACAAGTCTG             |
| primer | <i>esr1</i>  | reverse   | genotyping (gDNA PCR) | TTTATCTGCACCCTTGCGGAGT             |
| primer | <i>esr1</i>  | forward   | genotyping (CS)       | AGGGAGGACCAGTGCGGCT                |
| primer | <i>esr2b</i> | forward   | genotyping (gDNA PCR) | AATAATGACCCGTTAACGTTGCT            |
| primer | <i>esr2b</i> | reverse   | genotyping (gDNA PCR) | TCAATTTTCAGTCACAAATGCAC            |
| primer | <i>esr2b</i> | forward   | genotyping (CS)       | TCCAGCTCCAAGAGGTAGATG              |
| primer | <i>esr2b</i> | forward   | genotyping (HRM)      | GCAGCCATGACTATGGGAAC               |
| primer | <i>esr2b</i> | reverse   | genotyping (HRM)      | GACTATGGGAGGGCCAAAAG               |
| probe  | <i>esr2b</i> | forward   | genotyping (HRM)      | GGGCCTGGACCGTTGACCTTCTATA<br>GTCC  |

gDNA PCR, PCR on genomic DNA; CS, cycle sequence; HRM, high resolution melt analysis.

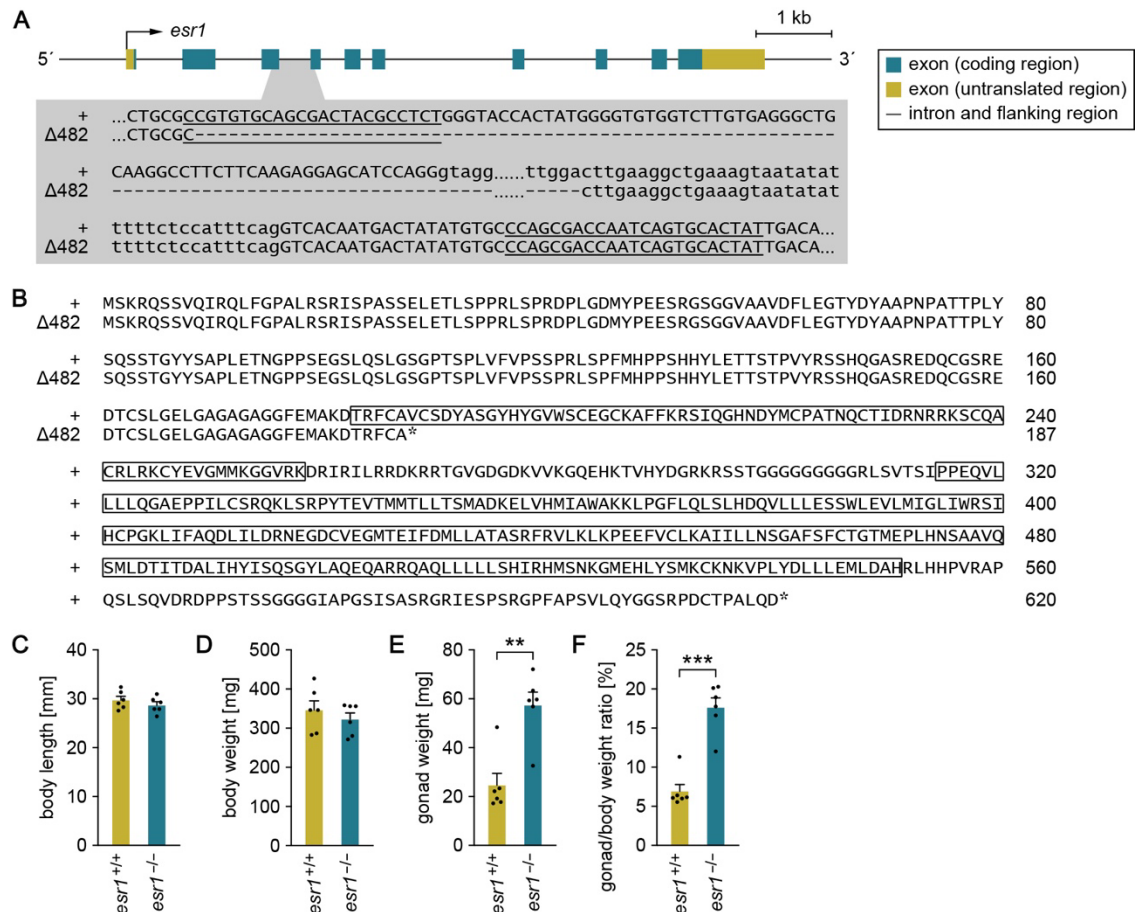

**Fig. S1. Generation and characterization of *esr1*-deficient medaka.** An *esr1* knockout medaka line was generated using CRISPR/Cas9-mediated genome editing. (A) The gene structure of medaka *esr1* is shown with the location of the two CRISPR target sites, which are enlarged to depict the nucleotide sequences of the wild-type (+) and targeted ( $\Delta 482$ ) alleles. Exon and intron sequences are given in uppercase and lowercase letters, respectively. The sequences targeted by the CRISPR RNAs are underlined and deleted nucleotides are represented by dashes. (B) Comparison of the deduced amino acid sequences of the wild-type and  $\Delta 482$  alleles. The DNA- and ligand-binding domains are indicated by the first and second boxes, respectively. Asterisks indicate stop codons. (C–F) Body length (C), body weight (D), gonad weight (E), and gonad/body weight ratio (F) of adult *esr1*<sup>+/+</sup> and *esr1*<sup>-/-</sup> females (n = 6 for each genotype). Statistical differences were assessed by unpaired *t*-test (C–F). \*\**p* < 0.01; \*\*\**p* < 0.001.

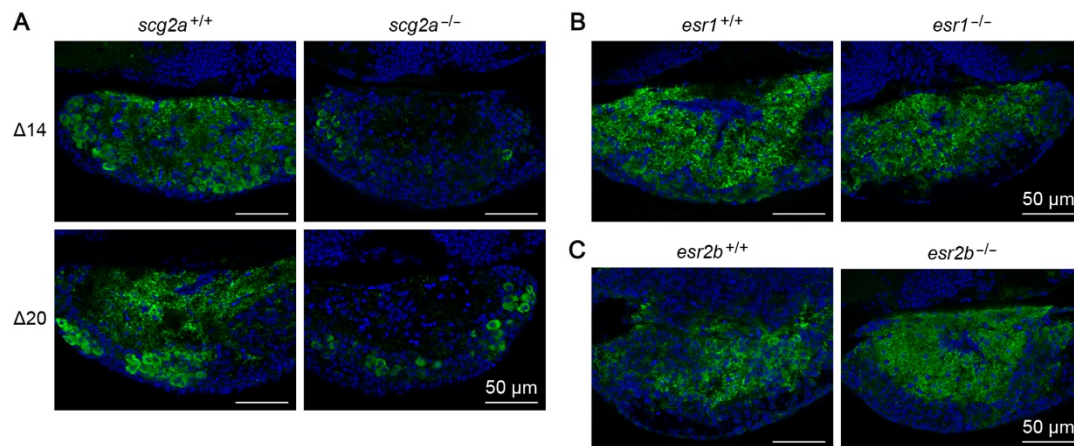

**Fig. S2. Localization and estrogen regulation of SNa in the pituitary.** (A) Representative micrographs of the pituitary from  $scg2a^{+/+}$  and  $scg2a^{-/-}$  females of the  $\Delta 14$  and  $\Delta 20$  lines (see Fig. S3) showing the localization of SNa immunofluorescence (green) in the pituitary. (B, C) Representative micrographs of the pituitary from  $esr1^{+/+}$  and  $esr1^{-/-}$  (B) and  $esr2b^{+/+}$  and  $esr2b^{-/-}$  (C) females showing no apparent effect on SNa immunofluorescence (green) in the pituitary from the loss of these receptors. Cell nuclei are shown in blue. Scale bars in all panels represent 50  $\mu\text{m}$ .

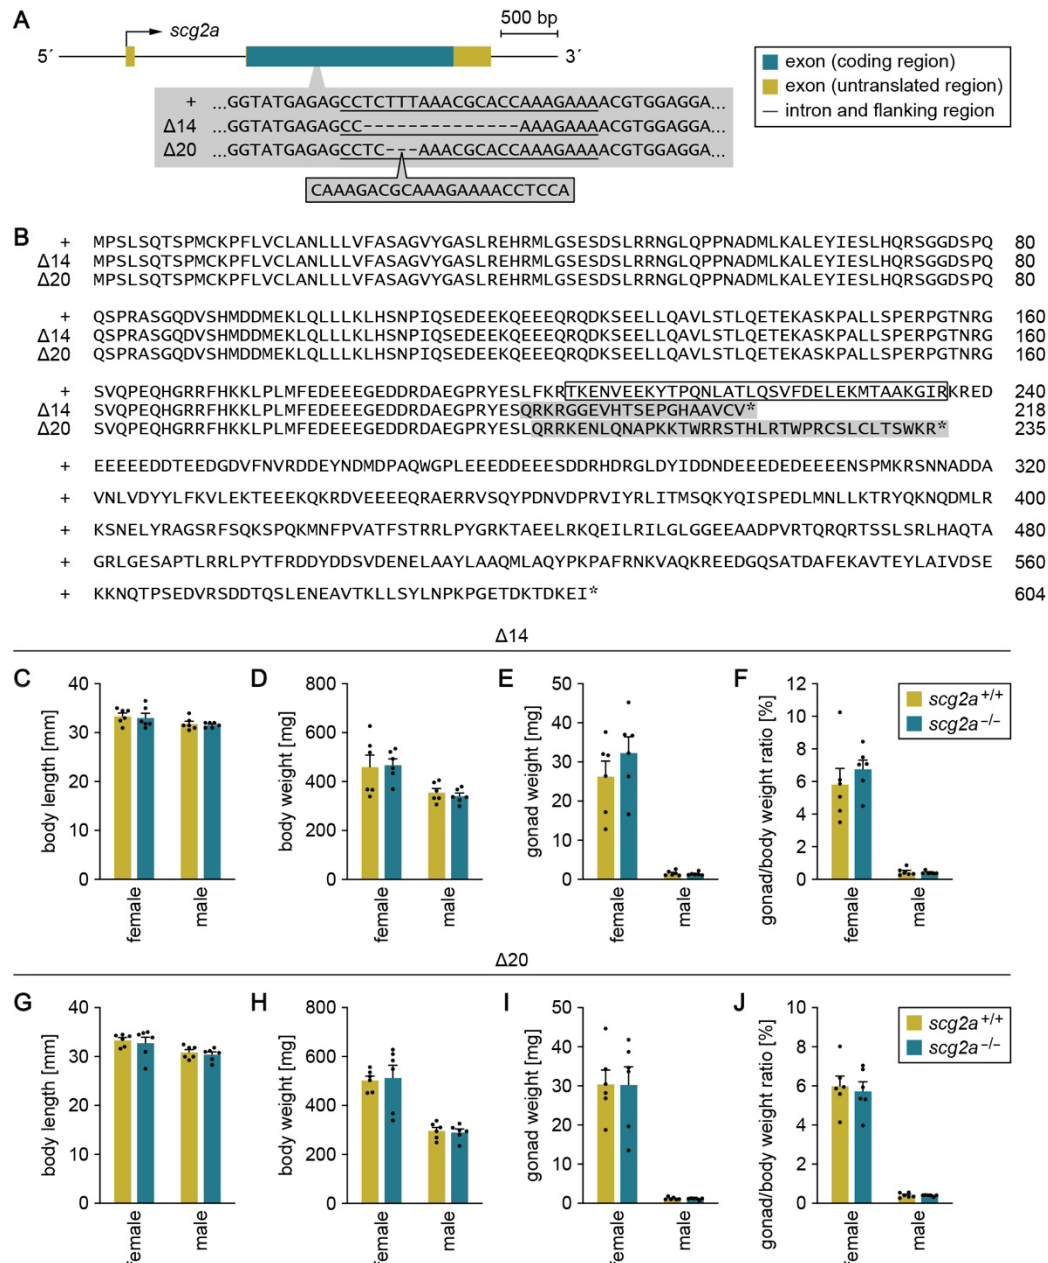

**Fig. S3. Generation and characterization of *scg2a*-deficient medaka.** Two independent lines of *scg2a* knockout medaka ( $\Delta 14$  and  $\Delta 20$ ) were generated using CRISPR/Cas9-mediated genome editing. (A) The gene structure of medaka *scg2a* is shown with the location of the CRISPR target site, which is enlarged to depict the nucleotide sequences of the wild-type (+) and targeted ( $\Delta 14$  and  $\Delta 20$ ) alleles. The sequence targeted by the CRISPR RNA is underlined and deleted nucleotides are represented by dashes. (B) Comparison of the deduced amino acid sequences of the wild-type,  $\Delta 14$ , and  $\Delta 20$  alleles. The mature SNa polypeptide region is indicated by a box. Altered sequence caused by a frameshift is shaded in gray. Asterisks indicate stop codons. (C–F) Body length (C), body weight (D), gonad weight (E), and gonad/body weight ratio (F) of adult *scg2a*<sup>+/+</sup> and *scg2a*<sup>-/-</sup> females and males of the  $\Delta 14$  line ( $n = 6$  for each sex and genotype). (G–J) Body length (G), body weight (H), gonad weight (I), and gonad/body weight ratio (J) of adult *scg2a*<sup>+/+</sup> and *scg2a*<sup>-/-</sup> females and males of the  $\Delta 20$  line ( $n = 6$  for each sex and genotype). Statistical differences were assessed by unpaired *t*-test with Bonferroni-Dunn correction (C–J).

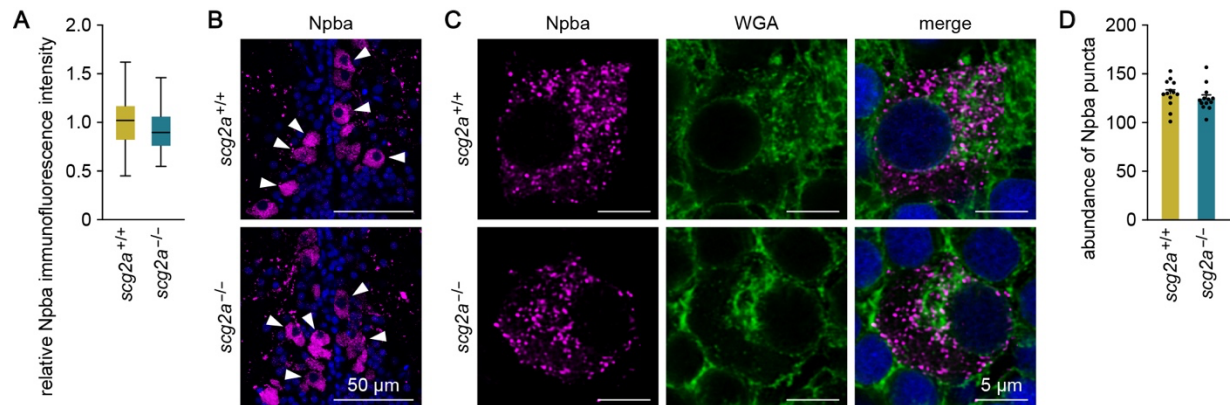

**Fig. S4. Scg2a is not involved in neuropeptide packaging to secretory granules in FeSP neurons— $\Delta 20$  line.** (A) Relative intensity of Npba immunofluorescence in FeSP neurons of *scg2a<sup>+/+</sup>* (n = 78 neurons) and *scg2a<sup>-/-</sup>* (n = 66 neurons) females. Mean intensity in *scg2a<sup>+/+</sup>* FeSP neurons was arbitrarily set to 1. (B) Representative micrographs showing Npba immunofluorescence (magenta) in FeSP neurons (arrowheads) of *scg2a<sup>+/+</sup>* and *scg2a<sup>-/-</sup>* females. Cell nuclei are shown in blue. Scale bars represent 50  $\mu\text{m}$ . (C) Representative micrographs showing the distribution of Npba puncta (left panels; magenta) in *scg2a<sup>+/+</sup>* and *scg2a<sup>-/-</sup>* FeSP neurons, counterstained with wheat germ agglutinin (WGA) (middle panels; green). Right panels show merged images with nuclear counterstaining (blue). Scale bars represent 5  $\mu\text{m}$ . (D) Abundance of Npba puncta in FeSP neurons of *scg2a<sup>+/+</sup>* and *scg2a<sup>-/-</sup>* females (n = 13 neurons for each genotype). Statistical differences were assessed by unpaired *t*-test (A, D).



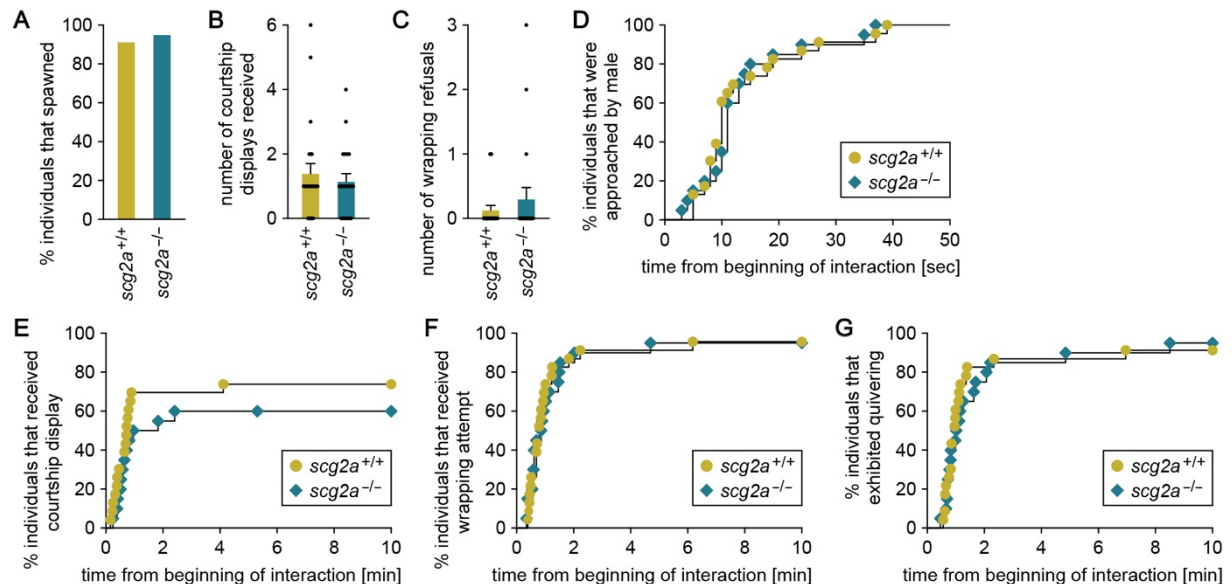

**Fig. S5. *scg2a*-deficient female medaka show no alterations in mating behavior— $\Delta 20$  line.** *scg2a*<sup>+/+</sup> (n = 23) and *scg2a*<sup>-/-</sup> (n = 20) females of the  $\Delta 20$  line were tested for mating behavior. (A) Percentage of individuals that spawned within the test period (10 min). (B, C) Number of courtship displays received (B) and wrapping refusals (C). (D–G) Latency from the beginning of interaction to the first approach (D), first courtship display (E), first wrapping attempt (F), and quivering (G). Statistical differences were assessed by Fisher’s exact test (A), unpaired *t*-test (B), unpaired *t*-test with Welch’s correction (C), and Gehan-Breslow-Wilcoxon test (D–G).

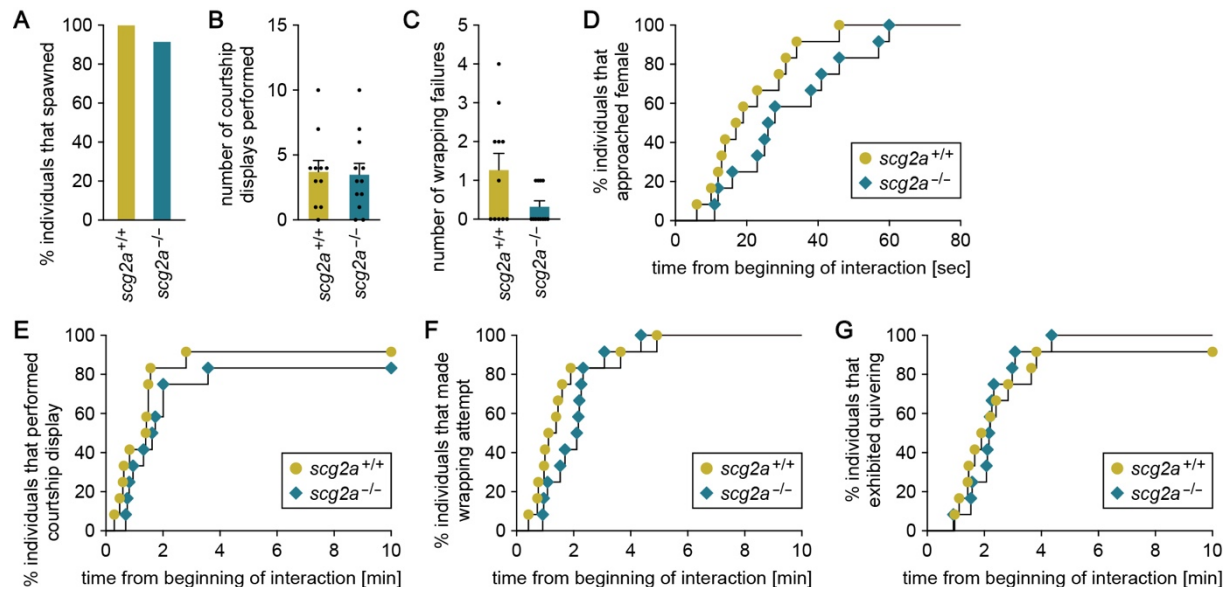

**Fig. S6. *scg2a*-deficient male medaka show no alterations in mating behavior— $\Delta$ 14 line.** *scg2a<sup>+/+</sup>* and *scg2a<sup>-/-</sup>* males ( $n = 12$  for each genotype) of the  $\Delta$ 14 line were tested for mating behavior. (A) Percentage of individuals that spawned within the test period (10 min). (B, C) Number of courtship displays performed (B) and wrapping refusals by the female (C). (D–G) Latency from the beginning of interaction to the first approach (D), first courtship display (E), first wrapping attempt (F), and quivering (G). Statistical differences were assessed by Fisher’s exact test (A), unpaired *t*-test (B), unpaired *t*-test with Welch’s correction (C), and Gehan-Breslow-Wilcoxon test (D–G).

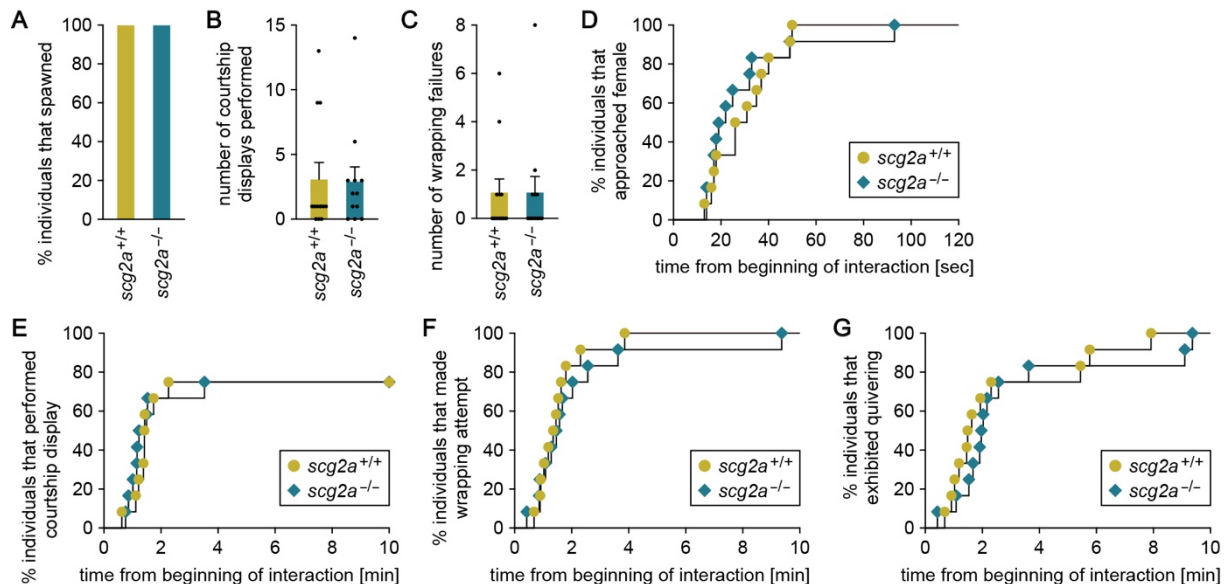

**Fig. S7. *scg2a*-deficient male medaka show no alterations in mating behavior— $\Delta 20$  line.** *scg2a<sup>+/+</sup>* and *scg2a<sup>-/-</sup>* males (n = 12 for each genotype) of the  $\Delta 20$  line were tested for mating behavior. (A) Percentage of individuals that spawned within the test period (10 min). (B, C) Number of courtship displays performed (B) and wrapping refusals by the female (C). (D–G) Latency from the beginning of interaction to the first approach (D), first courtship display (E), first wrapping attempt (F), and quivering (G). Statistical differences were assessed by Fisher’s exact test (A), unpaired *t*-test (B, C), and Gehan-Breslow-Wilcoxon test (D–G).

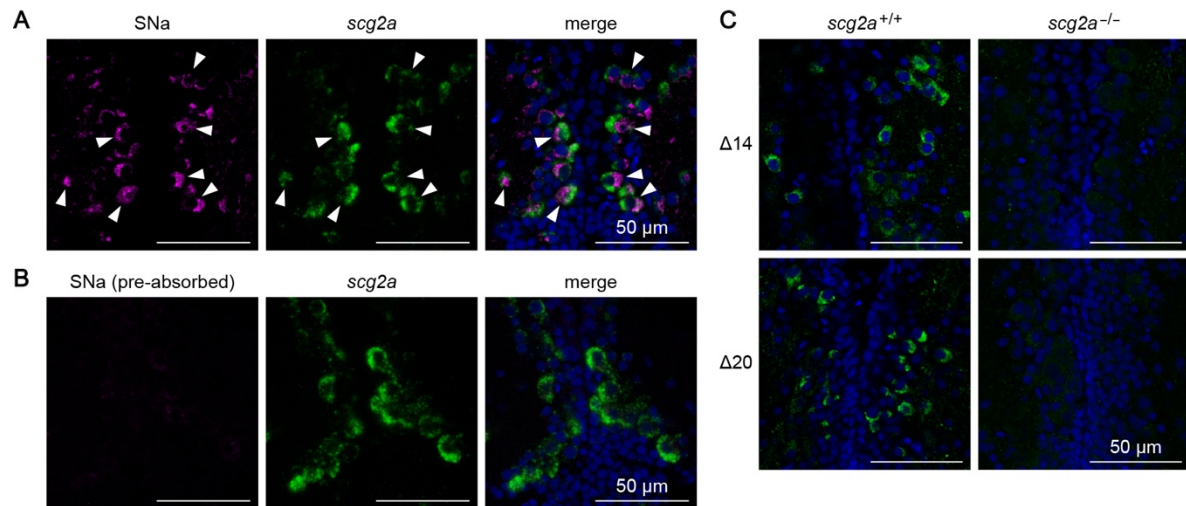

**Fig. S8. Validation of the anti-SNa antibody.** All micrographs shown are representative images of the PMm/PMg of females. (A) Co-localization of immunofluorescence obtained with the anti-SNa antibody (left panel; magenta) and *scg2a* transcript (middle panel; green); right panel shows the merged image with nuclear counterstaining (blue). Arrowheads indicate representative neurons labeled with both SNa immunofluorescence and *scg2a* transcript. (B) Loss of immunofluorescence (left panel; magenta) in neurons expressing the *scg2a* transcript (middle panel; green) after pre-absorption of the anti-SNa antibody with the SNa polypeptide; right panel shows the merged image with nuclear counterstaining (blue). (C) Loss of neurons immunolabeled with the anti-SNa antibody (green) in *scg2a*<sup>-/-</sup> fish from both Δ14 and Δ20 lines (compare right panels with left panels). Cell nuclei are shown in blue. Scale bars in all panels represent 50 μm.
